# Supplementary material for: Influence of simulated food and oral processing on carotenoid and chlorophyll in vitro bioaccessibility among six spinach genotypes
Source: Royal Society of Chemistry journal article supplement (doi:10.1039/d1fo00600b), 2021-01-01

**Supplemental Figure 1a-c:** PCA plot of the Bioaccessible Content of Each Phytochemical Analyzed Labeled by Genotype (a) and Processing Method (c).

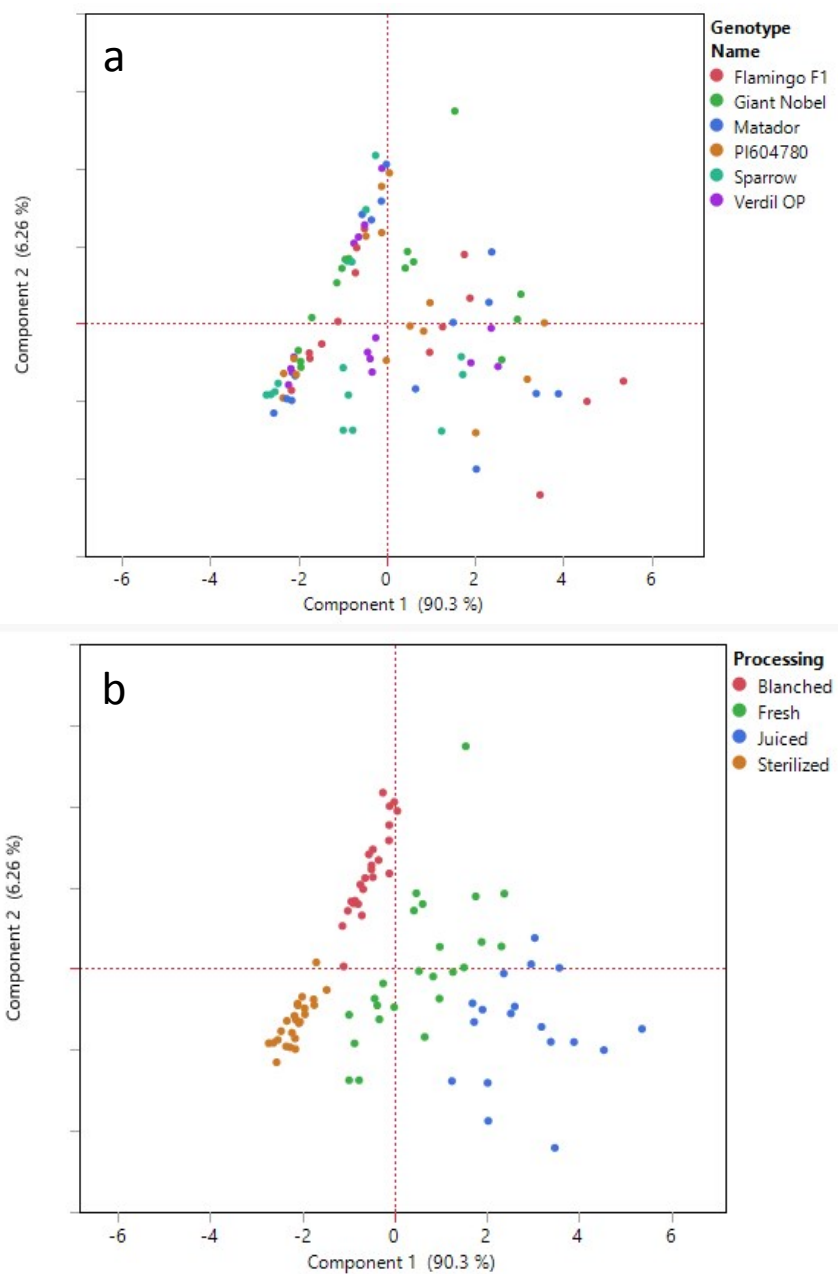

Supplement: d1fo00600b1.pdf [file d1fo00600b1.pdf]
